# Supplementary material for: Serine is the major residue for ADP-ribosylation upon DNA damage
Source: eLife journal article supplement (doi:10.7554/elife.34334), 2018-02-26
Supplement: supp [file elife-34334-supp-v1.zip]

Archive with 1 entries (1 files):
- elife_poa_e34334_Transparent_Reporting_Form.pdf
